# Supplementary material for: Zinc transporter ZIP13 suppresses beige adipocyte biogenesis and energy expenditure by regulating C/EBP-β expression
Source: PubMed Central journal article supplement (PMC5576661; doi:10.1371/journal.pgen.1006950), 2017-08-30
Supplement: pgen.1006950.s014.pdf [file pgen.1006950.s014.pdf]

## Supplemental table

**Table S3. Primer sequences**

| Gene                             | Species | Forward primer           | Reverse primer             |
|----------------------------------|---------|--------------------------|----------------------------|
| <i>18S</i>                       | mouse   | TTC TGGCCAACGGTCTAGACAAC | CCAGTGGTCTTGGTGTGCTGA      |
| <i>aP2</i>                       | mouse   | ACACCGAGATTTCTTCAAAC TG  | CCATCTAGGGTTATGATGCTCTTCA  |
| <i>PPAR<math>\gamma</math></i>   | mouse   | GTGCCAGTTTTCGATCCGTAGA   | GGCCAGCATCGTGTAGATGA       |
| <i>Cidea</i>                     | mouse   | ATCACAAC TGGCCTGGTTACG   | TACTACCCGGTGTCCATTTCT      |
| <i>Cox8b</i>                     | mouse   | GAACCATGAAGCCAACGACT     | GCGAAGTTCACAGTGGTTCC       |
| <i>Pgc1<math>\alpha</math></i>   | mouse   | AGCCGTGACCACTGACAACGAG   | GCTGCATGGTTCTGAGTGCTAAG    |
| <i>Prdm16</i>                    | mouse   | TGGCCTTCATCACCTCTCTGAA   | TTTCTGATCCACGGCTCCTGTGA    |
| <i>Ucp1</i>                      | mouse   | CACCTTCCCCTGGACACT       | CCCTAGGACACCTTTATACCTAATGG |
| <i>C/EBP-<math>\beta</math></i>  | mouse   | AAGCTGAGCGACGAGTACAAGA   | GTCAGCTCCAGCACCTTGTG       |
| <i>C/EBP-<math>\delta</math></i> | mouse   | CGACTTCAGCGCCTACATTGA    | CTAGCGACAGACCCACAC         |
| <i>Krox20</i>                    | mouse   | TGACTATTGTGGCCGCAAGTT    | TTCTGCCGAAGGTGGATCTT       |
| <i>Resistin</i>                  | mouse   | AAGAACCTTTTCATTTCCCCTCCT | GTCCAGCAATTTAAGCCAATGTT    |
| <i>Agt</i>                       | mouse   | GCACCCTGGTCTCTTTCTACC    | TGTGTCCATCTAGTCGGGAGG      |
| <i>Pank3</i>                     | mouse   | TGCTGTAGTGTCCATTTCTGCCT  | AGCTGGAACAGCAACACCTAGGAA   |
| <i>Ednra</i>                     | mouse   | AGCAGGAAGGTGTGCTGACT     | GTAGGAGGCATCTGGGTTGA       |
| <i>Zip13</i>                     | mouse   | AGGCCCCAGCAAAGACCCCA     | CTTTTTGCTCACAAGGAAGCT      |
| <i>MT1A</i>                      | mouse   | GCCTGCAAGA ACTGCAAGTG    | ATAGGAAGACGCTGGGTTGG       |
